# Supplementary material
Source: bioRxiv or medRxiv preprint supplement (https://www.biorxiv.org/content/biorxiv/early/2021/01/01/2021.01.01.425060/DC1/embed/media-1.pdf)
Supplement: Supplementary file [file media-1.pdf]

Table S1. Oligonucleotides used in this paper

| Primer | Primer Sequence (5' - 3')        |
|--------|----------------------------------|
| P1     | GAAGAGGTTCGGACTGCTGTC            |
| P2     | CCTTAGTAATGCCAACCTGAGAAGC        |
| P3     | CAAGATAGCCCGAGAGGGTC             |
| P4     | GATGTGCAGCACTGTCTGC              |
| P5     | AGATGAGGCCGTGCTTCTC              |
| P6     | CCTGGTCTGGTCCCAAGATG             |
| P7     | GCACGAGTTCTCCGTGGAC              |
| P8     | GGCCAAGGTAGGAAACAGC              |
| P9     | TGTCATCCGGTATCTGCACA             |
| P10    | CGGCGTACACATCTTTCGAG             |
| P11    | GGCTGTATTCCCCTCCATCG             |
| P12    | CCAGTTGGTAACAATGCCATG            |
| P13    | CCTACCATGCCGTGTCCTTCTA           |
| P14    | AACGACCCCTGCAGCAATAC             |
| P15    | CGCGGATCCATGGGCGCGACGACT         |
| P16    | CGAGATATCTGACATGAAATAGAAATCGCGTT |
| P17    | CCGGAATTCTCACATGAAATAGAAATCGCGTT |
| P18    | CGCGGATCCATGGGCGCGACGACTGC       |
| P19    | CCCAAGCTTTCACATGAAATAGAAATC      |
